# Supplementary material for: Tissue-engineered vascular graft based on a bioresorbable tubular knit scaffold with flexibility, durability, and suturability for implantation
Source: Royal Society of Chemistry journal article supplement (doi:10.1039/d2tb01891h), 2022-12-06
Supplement: d2tb01891h1.pdf [file d2tb01891h1.pdf]

## Supporting information

### Tissue-engineered vascular graft based on a bioresorbable tubular knit scaffold with flexibility, durability, and suture-ability for implantation

Dong Yeop Lee <sup>a†</sup>, Yongwoo Jang <sup>b†</sup>, Eunyoung Kim<sup>a</sup>, Tao Li <sup>a</sup>, Seon Jeong Kim <sup>a\*</sup>

<sup>a</sup> Center for Self-Powered Actuation, Department of Electronic Engineering, Hanyang University, Seoul 04763, Korea

<sup>b</sup> Department of Pharmacology, College of Medicine, Hanyang University, Seoul 04736, Korea.

**KEYWORDS:** Tissue-engineered vascular graft (TEVG), polyglycolic acid, tubular knit, flexibility, durability, suture-ability.

<sup>†</sup> Dong Yeop Lee, Yongwoo Jang contributed equally to this work.

\* To whom correspondence should be addressed: [sjk@hanyang.ac.kr](mailto:sjk@hanyang.ac.kr)

**A**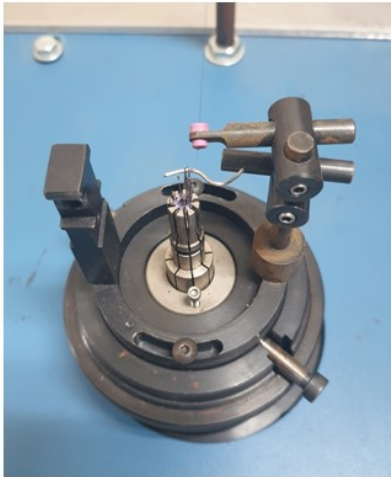**B**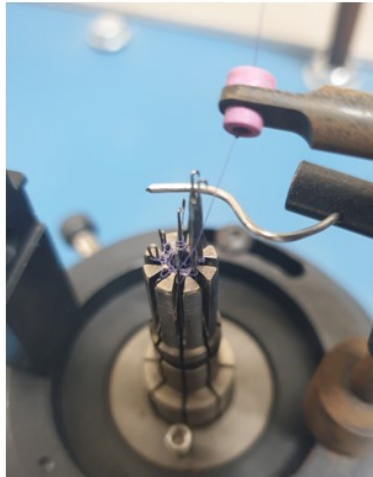

**Figure S1.** Tubular knit scaffold is manufactured by knitting PGA suture fiber from knitting machine.

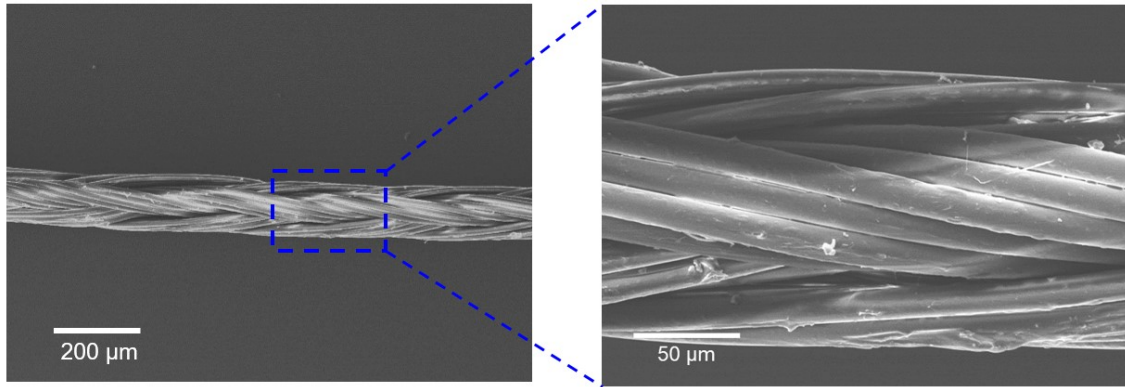

**Figure S2.** Scanning electron microscope (SEM) image of PGA suture fiber (130 μm thickness) composed of the bundle of PGA microfiber.

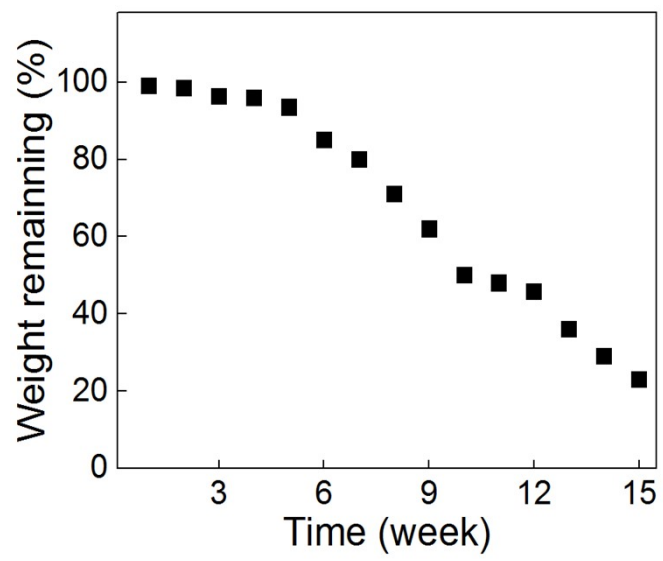

**Figure S3.** Biodegradable experiment of tubular knit scaffolds made of 130  $\mu\text{m}$  PGA suture fiber in PBS.

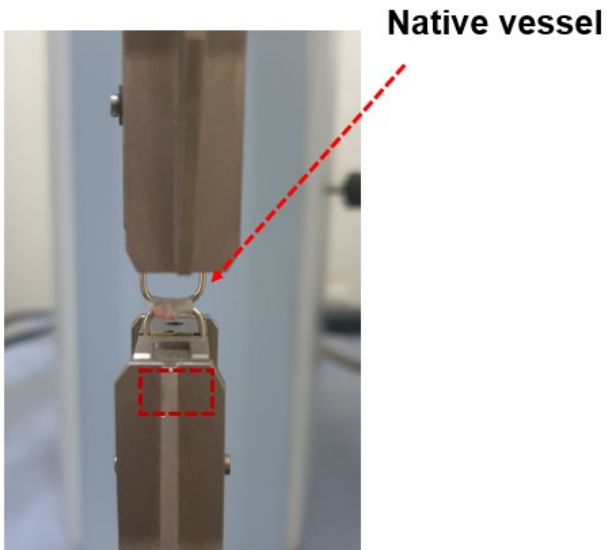

**Figure S4.** Optical image of native vessel for stretching test of circumferential stress.

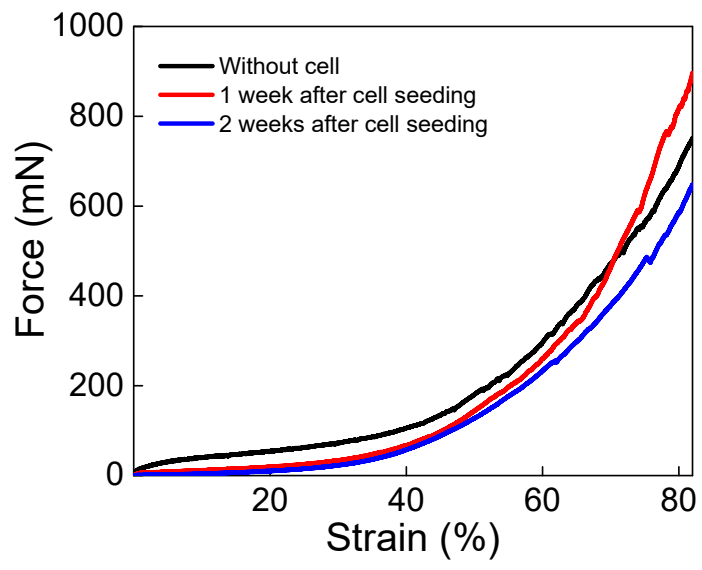

**Figure S5.** Force-strain curve for tubular knit scaffold (black color) and cell cultured tubular knit scaffold (1 week and 2 weeks).

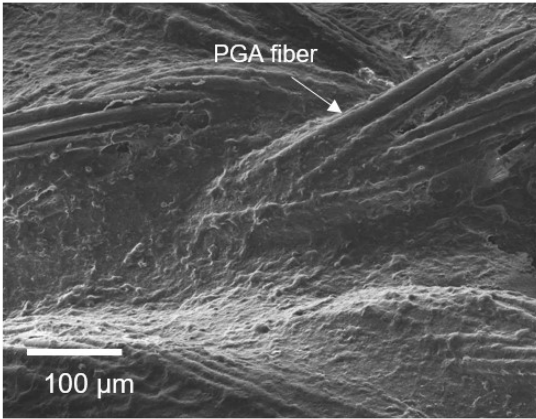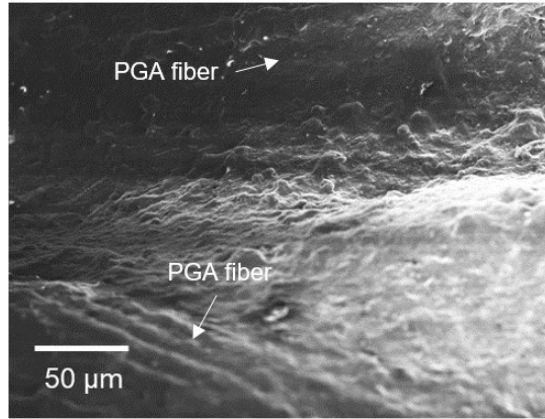

**Figure S6.** SEM image of the tissue engineered vascular grafts using tubular PGA knit scaffolds 8 days after cell seeding.
